# Supplementary material
Source: PubMed Central journal article supplement (PMC4438083)
Supplement: NIHMS668453-supplement-1.pdf [file NIHMS668453-supplement-1.pdf]

**The Effect of Tricuspid Regurgitation and the Right Heart on Survival after Transcatheter  
Aortic Valve Replacement: Insights from the PARTNER II Inoperable Cohort**

Lindman et al. *Tricuspid Regurgitation, Right Heart, and TAVR*

**Online Data Supplement**

| <b>Online Table 1.</b> Multivariable analysis for 1-year all-cause death.                                                                                            |                              |                |
|----------------------------------------------------------------------------------------------------------------------------------------------------------------------|------------------------------|----------------|
| <b>Variable</b>                                                                                                                                                      | <b>Hazard ratio (95% CI)</b> | <b>p-value</b> |
| <b>Tricuspid regurgitation – main model (n=499; 112 deaths)</b>                                                                                                      |                              |                |
| TR severity (moderate/severe vs. no/trace/mild)                                                                                                                      | 1.76 (1.14, 2.70)            | 0.01           |
| TR severity (no/trace/mild referent)                                                                                                                                 | ---                          | ---            |
| Moderate TR                                                                                                                                                          | 1.60 (1.02, 2.52)            | 0.042          |
| Severe TR                                                                                                                                                            | 3.20 (1.50, 6.82)            | 0.003          |
| <b>Tricuspid regurgitation – main model +<br/>Tricuspid valve regurgitation velocity from baseline echo<br/>(n=418; 103 deaths)</b>                                  |                              |                |
| TR severity (moderate/severe vs. no/trace/mild)                                                                                                                      | 1.64 (1.02, 2.63)            | 0.041          |
| <i>Tricuspid valve regurgitation velocity (baseline)</i>                                                                                                             | 1.00 (1.00, 1.00)            | 0.74           |
| TR severity (no/trace/mild referent)                                                                                                                                 | ---                          | ---            |
| <i>Tricuspid valve regurgitation velocity (baseline)</i>                                                                                                             | 1.00 (1.00, 1.00)            | 0.65           |
| Moderate TR                                                                                                                                                          | 1.49 (0.91, 2.43)            | 0.11           |
| Severe TR                                                                                                                                                            | 2.90 (1.34, 6.28)            | 0.007          |
| <b>Tricuspid regurgitation – main model +<br/>Right ventricular systolic pressure from baseline echo<br/>(n=367; 87 deaths)</b>                                      |                              |                |
| TR severity (moderate/severe vs. no/trace/mild)                                                                                                                      | 2.00 (1.18, 3.37)            | 0.01           |
| <i>Right ventricular systolic pressure (baseline)</i>                                                                                                                | 1.00 (0.99, 1.02)            | 0.79           |
| TR severity (no/trace/mild referent)                                                                                                                                 | ---                          | ---            |
| <i>Right ventricular systolic pressure (baseline)</i>                                                                                                                | 1.00 (0.99, 1.02)            | 0.75           |
| Moderate TR                                                                                                                                                          | 1.80 (1.05, 3.08)            | 0.033          |
| Severe TR                                                                                                                                                            | 3.87 (1.70, 8.79)            | 0.001          |
| <b>Tricuspid regurgitation – main model +<br/>Pulmonary artery systolic pressure from pre-BAV<br/>hemodynamics (n=431; 98 deaths)</b>                                |                              |                |
| TR severity (moderate/severe vs. no/trace/mild)                                                                                                                      | 1.88 (1.19, 2.98)            | 0.007          |
| <i>PA pressure – systolic (pre-BAV)</i>                                                                                                                              | 1.01 (0.99, 1.02)            | 0.35           |
| TR severity (no/trace/mild referent)                                                                                                                                 | ---                          | ---            |
| <i>PA pressure – systolic (pre-BAV)</i>                                                                                                                              | 1.01 (0.99, 1.02)            | 0.27           |
| Moderate TR                                                                                                                                                          | 1.68 (1.03, 2.74)            | 0.037          |
| Severe TR                                                                                                                                                            | 3.42 (1.57, 7.46)            | 0.002          |
| <b>Tricuspid regurgitation – main model +<br/>Mean pulmonary artery pressure from pre-BAV<br/>hemodynamics (n=408; 94 deaths)</b>                                    |                              |                |
| TR severity (moderate/severe vs. no/trace/mild)                                                                                                                      | 2.20 (1.38, 3.52)            | 0.001          |
| <i>Mean PA pressure (pre-BAV)</i>                                                                                                                                    | 1.01 (0.99, 1.03)            | 0.46           |
| TR severity (no/trace/mild referent)                                                                                                                                 | ---                          | ---            |
| <i>Mean PA pressure (pre-BAV)</i>                                                                                                                                    | 1.01 (0.99, 1.03)            | 0.35           |
| Moderate TR                                                                                                                                                          | 1.97 (1.20, 3.24)            | 0.007          |
| Severe TR                                                                                                                                                            | 3.91 (1.78, 8.59)            | 0.001          |
| <b>Tricuspid regurgitation – main model +<br/>Paravalvular aortic regurgitation (moderate/severe vs.<br/>none/mild/trace) from discharge echo (n=460; 95 deaths)</b> |                              |                |
| TR severity (moderate/severe vs. no/trace/mild)                                                                                                                      | 1.69 (1.05, 2.71)            | 0.03           |
| <i>Paravalvular AR (discharge echo)</i>                                                                                                                              | 1.18 (0.74, 1.87)            | 0.49           |
| TR severity (no/trace/mild referent)                                                                                                                                 | ---                          | ---            |
| <i>Paravalvular AR (discharge echo)</i>                                                                                                                              | 1.15 (0.72, 1.84)            | 0.55           |
| Moderate TR                                                                                                                                                          | 1.59 (0.98, 2.60)            | 0.06           |
| Severe TR                                                                                                                                                            | 2.58 (1.08, 6.15)            | 0.033          |

|                                                                                                                                                                                                                                                                                                                                                                                                                                    |                          |              |
|------------------------------------------------------------------------------------------------------------------------------------------------------------------------------------------------------------------------------------------------------------------------------------------------------------------------------------------------------------------------------------------------------------------------------------|--------------------------|--------------|
| <b>Tricuspid regurgitation – main model +<br/>Tricuspid valve regurgitation velocity from discharge echo<br/>(n=406; 89 deaths)</b>                                                                                                                                                                                                                                                                                                |                          |              |
| TR severity (moderate/severe vs. no/trace/mild)                                                                                                                                                                                                                                                                                                                                                                                    | 1.58 (0.97, 2.56)        | 0.06         |
| <i>Tricuspid valve regurgitation velocity (discharge echo)</i>                                                                                                                                                                                                                                                                                                                                                                     | <i>1.00 (1.00, 1.01)</i> | <i>0.28</i>  |
| TR severity (no/trace/mild referent)                                                                                                                                                                                                                                                                                                                                                                                               | ---                      | ---          |
| <i>Tricuspid valve regurgitation velocity (discharge echo)</i>                                                                                                                                                                                                                                                                                                                                                                     | <i>1.00 (1.00, 1.01)</i> | <i>0.23</i>  |
| Moderate TR                                                                                                                                                                                                                                                                                                                                                                                                                        | 1.45 (0.88, 2.40)        | 0.15         |
| Severe TR                                                                                                                                                                                                                                                                                                                                                                                                                          | 2.79 (1.17, 6.67)        | 0.02         |
| <b>Tricuspid regurgitation – main model +<br/>Right ventricular systolic pressure from discharge echo<br/>(n=353; 75 deaths)</b>                                                                                                                                                                                                                                                                                                   |                          |              |
| TR severity (moderate/severe vs. no/trace/mild)                                                                                                                                                                                                                                                                                                                                                                                    | 1.51 (0.89, 2.56)        | 0.13         |
| <i>Right ventricular systolic pressure (discharge echo)</i>                                                                                                                                                                                                                                                                                                                                                                        | <i>1.02 (1.00, 1.03)</i> | <i>0.049</i> |
| TR severity (no/trace/mild referent)                                                                                                                                                                                                                                                                                                                                                                                               | ---                      | ---          |
| <i>Right ventricular systolic pressure (discharge echo)</i>                                                                                                                                                                                                                                                                                                                                                                        | <i>1.02 (1.00, 1.03)</i> | <i>0.043</i> |
| Moderate TR                                                                                                                                                                                                                                                                                                                                                                                                                        | 1.44 (0.84, 2.48)        | 0.19         |
| Severe TR                                                                                                                                                                                                                                                                                                                                                                                                                          | 2.29 (0.80, 6.55)        | 0.12         |
| Multivariable Cox proportional hazards models evaluating the association between tricuspid regurgitation (TR) and 1-year all-cause death, adjusted for age, sex, body mass index, STS score, prior infarct, prior CABG, frailty, permanent pacemaker, atrial arrhythmia, aortic valve mean gradient, left ventricular ejection fraction, and mitral regurgitation (main model) <i>plus 1 additional variable delineated above.</i> |                          |              |

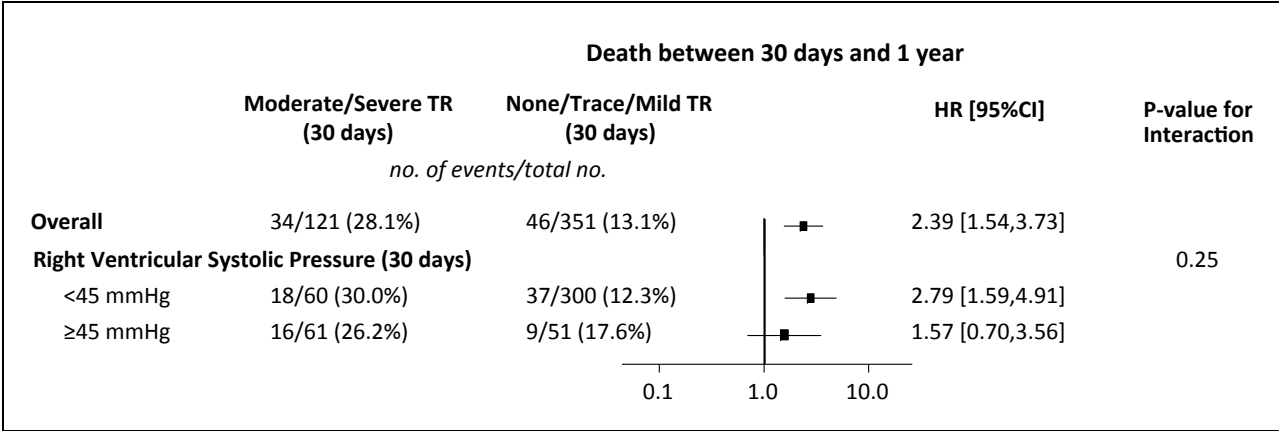

**Online Figure 1. Effect of pulmonary artery pressure at 30 days on the association between tricuspid regurgitation severity at 30 days and all-cause death.** Cox proportional hazards models were used to evaluate the hazard ratios for 30 day to 1-year death from any cause for patients with moderate/severe versus no/trace/mild tricuspid regurgitation (TR) at 30 days. The interaction with right ventricular systolic pressure at 30 days was assessed.
